# Supplementary material for: Beyond Purple Tomatoes: Combined Strategies Targeting Anthocyanins to Generate Crimson, Magenta, and Indigo Fruit
Source: MDPI journal article supplement (doi:10.3390/horticulturae7090327), 2021-09-21
Supplement: s1 [file s1]

## Article

# Supplementary Materials: Beyond Purple Tomatoes: Combined Strategies Targeting Anthocyanins to Generate Crimson, Magenta, and Indigo Fruit

Eugenio Butelli <sup>1,\*</sup>, Katharina Bulling <sup>1,2</sup>, Lionel Hill <sup>1</sup> and Cathie Martin <sup>1</sup>

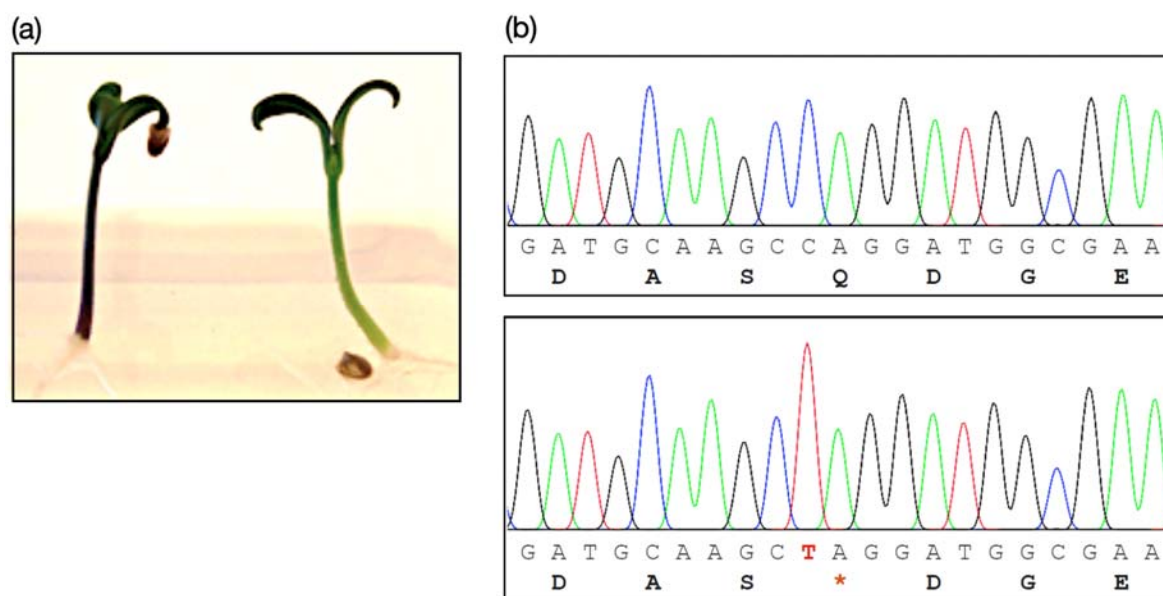

**Figure S1.** Phenotypic and genetic analysis of tomato seedlings harbouring the  $\beta 3'5'h$  mutation. (a) F2 seedlings after self-pollination of F1 hybrids obtained crossing the *anthocyaninless* (*a*) mutant with the 'Purple' *Del/Ros1* tomato showing presence (left) or absence (right) of anthocyanins in hypocotyl and cotyledons. (b) Chromatograms, nucleotide, and amino acid sequences showing the presence of a premature stop codon in the gene encoding F3'5'H in anthocyaninless (bottom panel) but not in cyanic seedlings (top panel).

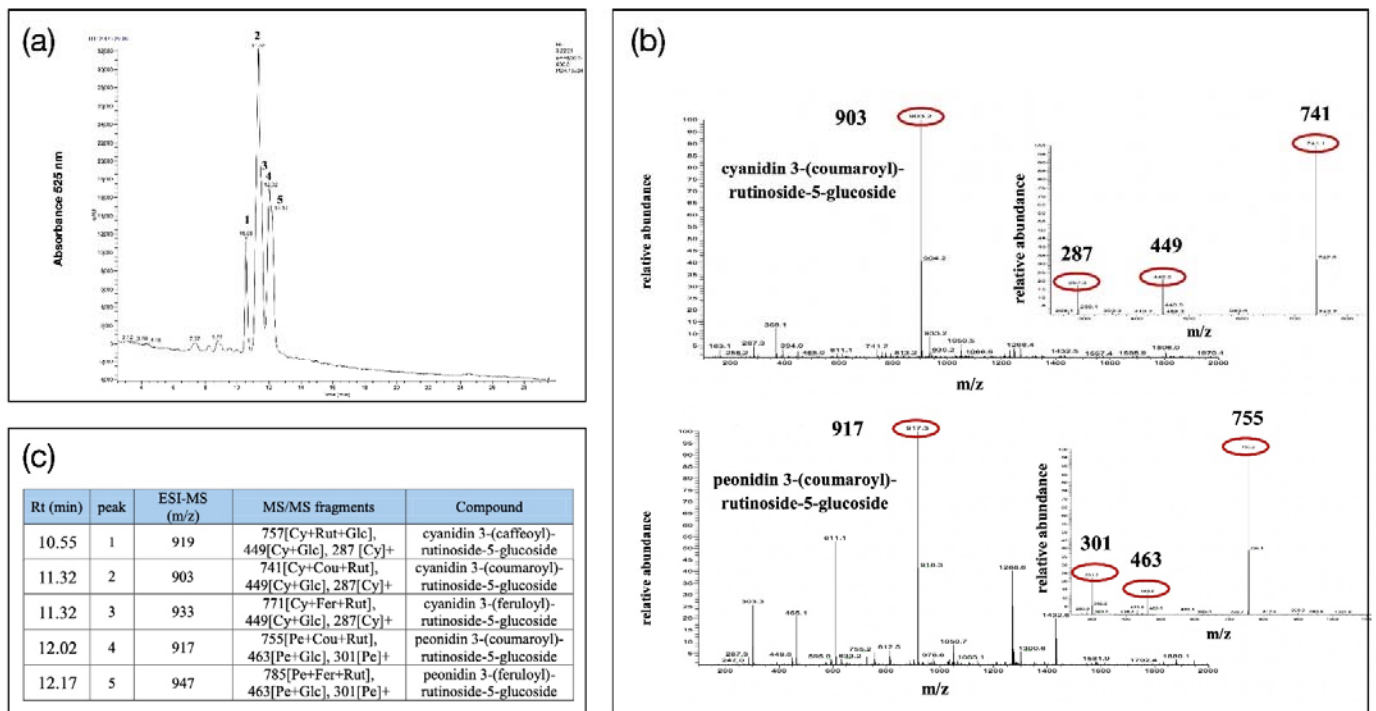

**Figure S2.** Analysis of anthocyanins extracted from the fruit of 'Pink' tomatoes (*Del/Ros1; f3'5'h*). (a) HPLC analysis showing the presence of five major compounds. (b) Mass analysis (MS1 and MS2) of the two most abundant compounds indicated as '2' and '4'. (c) Table showing the identity of all the five major peaks, all corresponding to C2 anthocyanins.

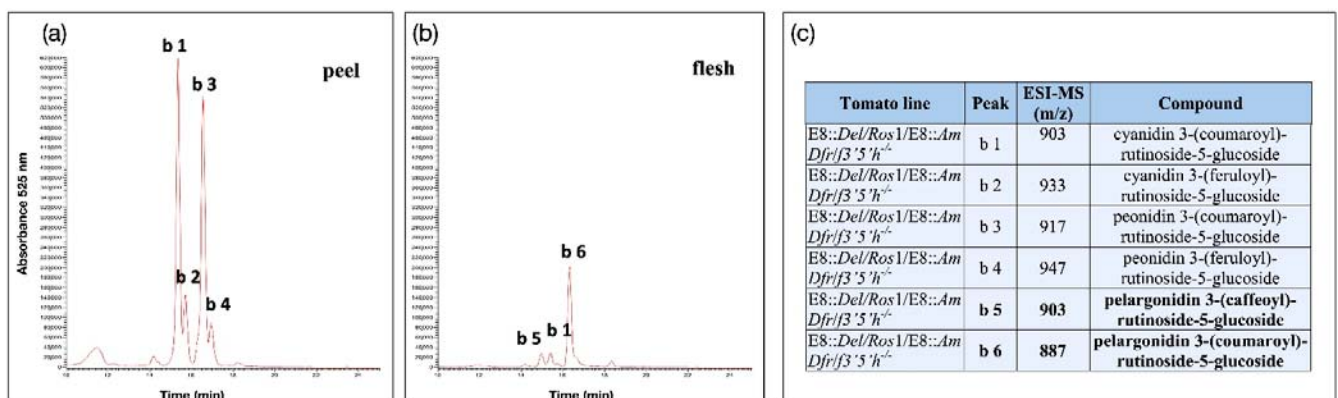

**Figure S3.** Analysis of anthocyanins from the fruit of 'Crimson' tomatoes (*Del/Ros1; AmDFR; f3'5'h*). (a) HPLC analysis in fruit peel. (b) HPLC analysis in fruit flesh. (c) Table showing the identity of all the major peaks based on mass spectrometry analysis.

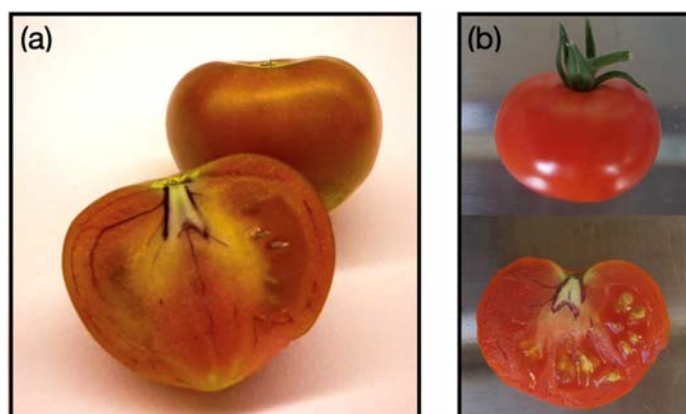

**Figure S4.** Fruit phenotypes of tomato lines expressing *Del/Ros1* in the presence of homozygous mutations affecting *F3'5'H* (a) or *DFR* (b). Both types of fruit display a vascular tissue visibly pigmented with anthocyanins.

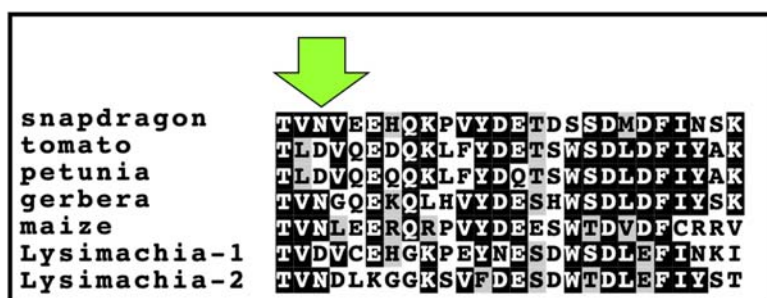

**Figure S5.** Alignment of a region of 26 amino acids in DFR identified as the substrate binding site for dihydroflavonols. The arrow indicates a key residue associated with the ability to recognise dihydrokaempferol (P1 precursor). Asparagine (N) is conserved in dihydrokaempferol-accepting DFRs but not in tomato or petunia, where it is replaced by aspartic acid (D). The GenBank accession numbers are: P14721 (snapdragon); NP\_001234408.2 (tomato); P14720.2 (petunia); P51105.1 (gerbera); P51108.1 (maize); BioProject PRJNA701383 (*Lysimachia arvensis*).

**Table S1.** Sequences of the primers used in the study.

| Name        | Sequence                              | Description                                                       |
|-------------|---------------------------------------|-------------------------------------------------------------------|
| DfrBglII_FA | CGAGAAGATCTATGAGTCCCACTTCACTAAATACGAG | Amplification and cloning of full-length <i>AmDFR</i> cDNA        |
| DfrSmaI_RE  | CAGTCCCCCGGGCTAGATTCTGCCATCAGTATGATCG |                                                                   |
| DFR_F1      | ACCACCGTATGTCACAGGA                   | Sequencing of <i>AmDFR</i> cDNA                                   |
| DFR_F2      | GAGAAAGCTGGAATGGAAGCA                 |                                                                   |
| DFR_F3      | AAGGGAGACGAGAAGGAACC                  |                                                                   |
| DFR_R1      | GGAAGGCAGACATGACAGTAGA                |                                                                   |
| DFR_R2      | TGGATGATCTGTGTGAGGGTCA                |                                                                   |
| DFR_R3      | CGTGTTAATGGACTAGAGAGCG                |                                                                   |
| EB-241      | GACTGGATGGATGTATTTTGTGTCA             | Genotyping of <i>AmDFR</i> transgenic plants                      |
| EB-242      | AGCAAATGTATCTTCCTTCTGCCT              |                                                                   |
| EB-655      | CAGGGTTGAACCGGTGTAGGA                 | Genotyping of <i>Del/Ros1</i> transgenic plants ( <i>AmRos1</i> ) |
| EB-656      | CCATCCTCCGTTGTTTCTAGCA                |                                                                   |
| EB-430      | GTCCAAGGCGATGAGGTCCA                  | Genotyping of <i>Del/Ros1</i> transgenic plants ( <i>AmDel</i> )  |
| EB-431      | ACCTCTGCTATTACGGCTCCA                 |                                                                   |
| MYB-F       | AGGCAAAACGCAGACTTGGGAGAACGA           | Genotyping of <i>AtMYB12</i> transgenic plants                    |
| MYB-R       | CACTACCTTCTTGCCAAACACAATCCCA          |                                                                   |
| EB-742      | GCCTATAATGCCCAAGACATGGT               | Isolation of <i>SIF3'5'H</i> genomic fragment                     |
| EB-743      | TCCTTCTGAATTATCCCTATTGCCA             |                                                                   |
| EB-744      | ACCCTATGGACCACGTTGGA                  | Detection of <i>f3'5'h</i> mutation                               |
